# Supplementary material
Source: PubMed Central journal article supplement (PMC2999845)
Supplement: NIHMS246659-supplement-1_si_001.pdf [file NIHMS246659-supplement-1_si_001.pdf]

## SUPPLEMENTAL MATERIALS

### A Conserved Helical Capping Hydrogen Bond in PAS Domains Controls Signaling Kinetics in the Superfamily Prototype Photoactive Yellow Protein

Masato Kumauchi, Sandip Kaledhonkar, Andrew Philip, James Wycoff, Miwa Hara, Yunxing Li, Aihua Xie, Wouter D. Hoff

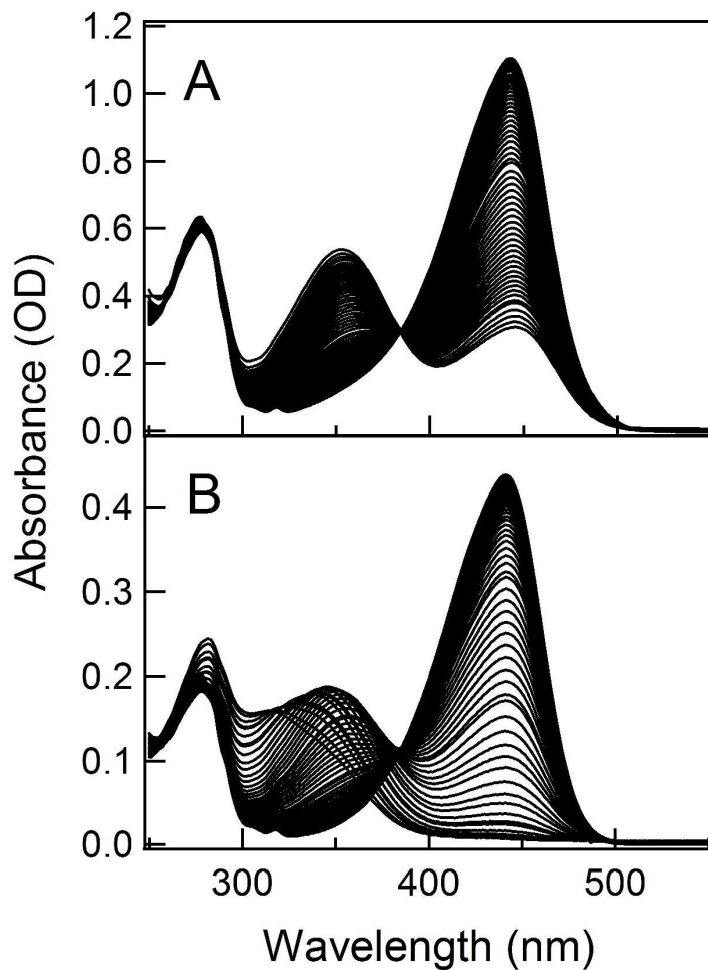

**Supplemental Fig. 1.** Absorbance spectra as a function of temperature for the N43A (A) and N43S (B) mutants of PYP. At lower temperatures the spectra exhibit a transition with an isosbestic point at 384 nm. The arrows indicate the direction of the spectral changes upon increasing the temperature.

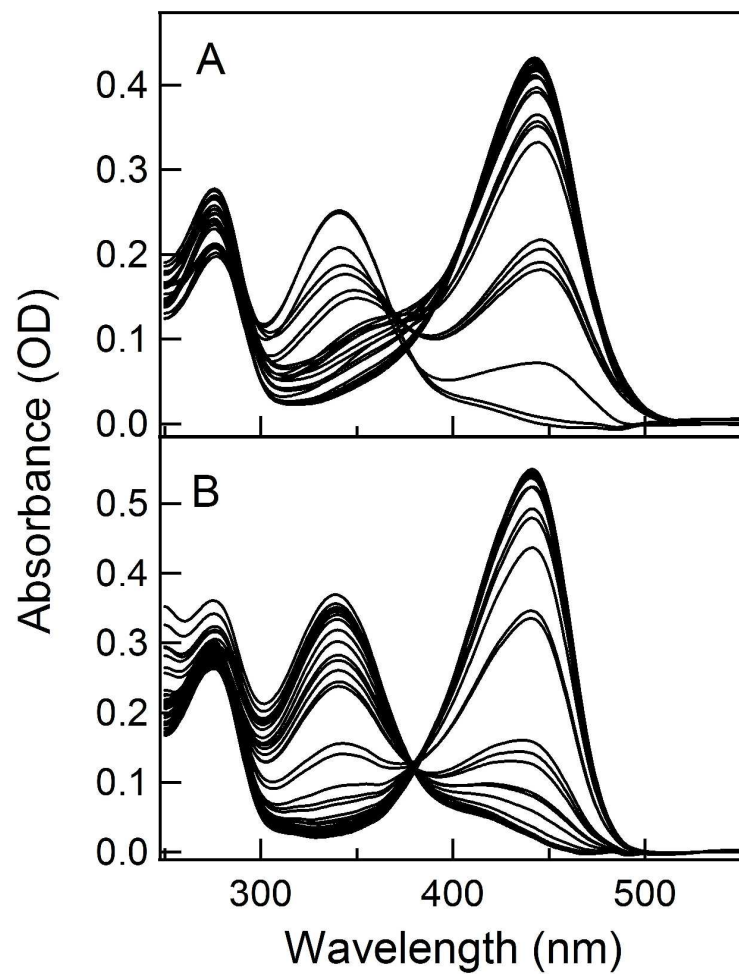

**Supplemental Fig. 2.** Absorbance spectra as a function of Gdn-HCl concentration for the N43A (A) and N43S (B) mutants of PYP. The arrows indicate the direction of the spectral changes upon increasing the Gdn-HCl concentration.

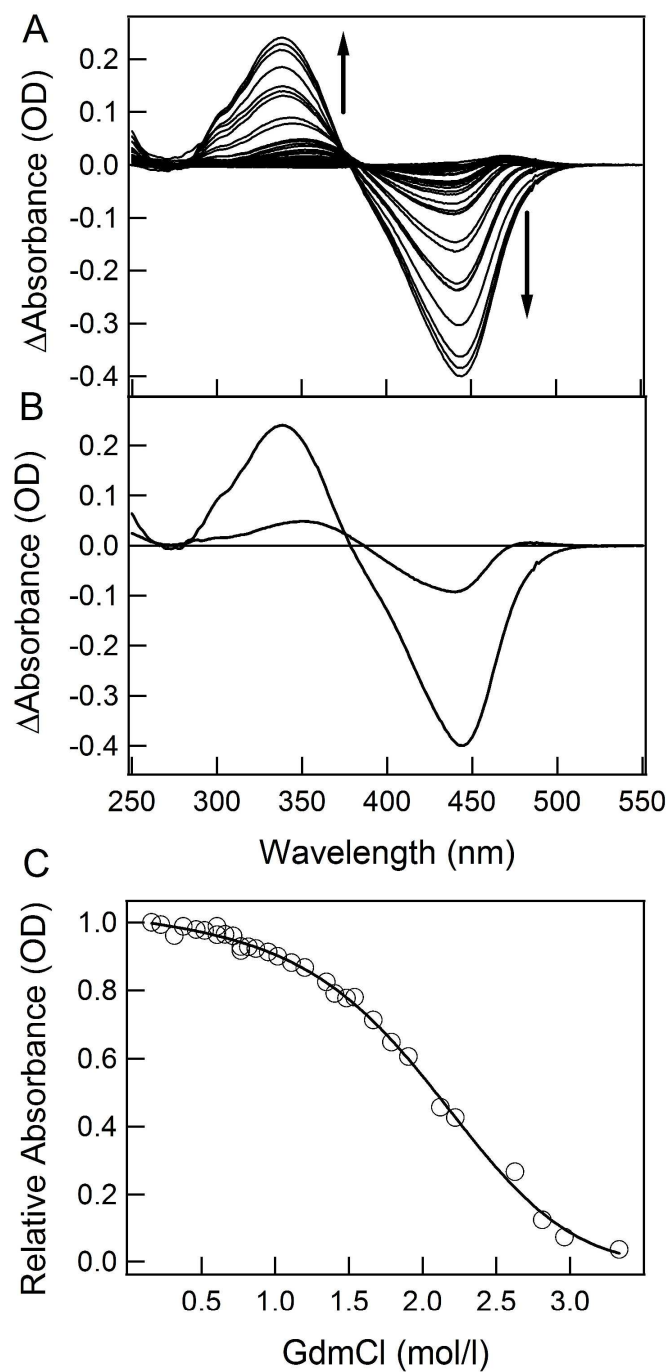

**Supplemental Fig. 3.** Complex denaturant-induced unfolding in the N43A mutant of PYP. (A) Absorbance difference spectra as a function of Gdn-HCl concentration for the N43A (calculated from the data in supplemental Fig. 2A). (B) Characteristic difference spectra for the first (below 0.8 M Gdn-HCl) and second phase of the unfolding transition. (C) Dependence of the absorbance at 446 nm on Gdm-HCl. Despite the non-isobestic nature of the transition and the spectral differences during the first and second half of the transition, the denaturant dependence of the transition as detected by the absorbance at 446 nm appears two-state.

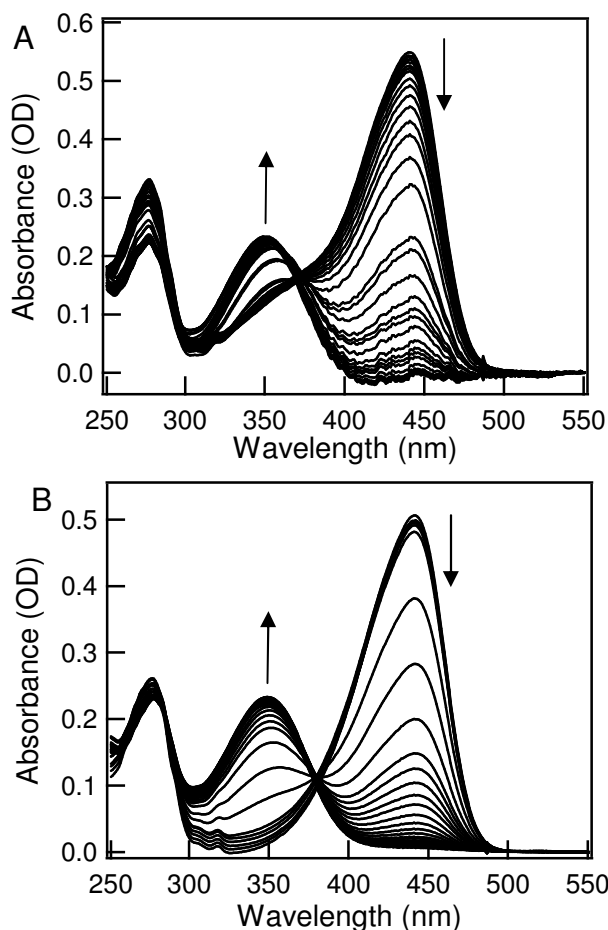

**Supplemental Fig. 4.** Determination of the  $pK_a$  of the *pCA* in the N43A (A) and N43S (B) mutants of PYP by acid titration monitored with UV/vis absorbance spectroscopy. The arrows indicate the direction of the spectral changes upon lowering the pH. The pH values for the spectra of N43A PYP are 7.98, 7.68, 7.45, 7.00, 6.58, 6.48, 5.96, 5.88, 5.79, 5.66, 5.57, 5.38, 5.32, 5.16, 5.03, 4.09, 4.75, 4.42, 4.34, 4.28, 4.25, 4.10, 4.04, 4.01, 3.87, 3.81, 3.75, 3.69, 3.51, 3.38, 3.33, 3.21, 3.05. The pH values for the spectra of N43S PYP are 7.46, 7.46, 7.39, 7.00, 5.84, 4.88, 4.21, 3.50, 3.26, 3.08, 2.89, 2.82, 2.76, 2.70, 2.58, 2.48, 2.35, 2.26, 2.20, 2.15, 2.08, 2.00, 1.92, 1.87, 1.69, 1.55, 1.46. The spectral shoulder of N43A PYP near 350 nm around neutral pH is due to a small amount of photoexcitation by ambient and/or measurement light and the very slow rate of *pB* decay in this mutant.

**Supplemental Table 1.** Conservation of PYP Asn43 hydrogen bonding in PAS domains.

| Protein <sup>a</sup> (PDB ID)  | Residue | Helical cap ( <i>n + i</i> ) $\alpha$ -helix 3 |   |                                         | Link to $\beta$ -strand 1 |                            |
|--------------------------------|---------|------------------------------------------------|---|-----------------------------------------|---------------------------|----------------------------|
| Asn                            |         | OD1                                            | i | length (Å)( <sup>o</sup> ) <sup>b</sup> | OD1                       | length (Å)( <sup>o</sup> ) |
| Hh PYP (1NWZ)                  | Asn43   | Glu46 NH                                       | 3 | 2.9 (136)                               | Ala30 NH                  | 2.9 (159)                  |
| Rc PYP (1MZU)                  | Asn43   | Glu46 NH                                       | 3 | 3.3 (150)                               | Ala30 NH                  | 2.8 (168)                  |
| Rm FixL (1D06)                 | Asn163  | Ala166 NH                                      | 3 | 2.8 (137)                               | Thr150 NH                 | 2.8 (172)                  |
| Av NifL (2GJ3)                 | Asn51   | Phe54 NH                                       | 3 | 2.9 (145)                               | Ile38 NH                  | 3.0 (159)                  |
| Ec DOS - O <sub>2</sub> (1VB6) | Asn46   | Ala49 NH                                       | 3 | 2.9 (138)                               | Ala33 NH                  | 2.8 (164)                  |
| Ec DOS + O <sub>2</sub> (1S67) | Asn46   | H <sub>2</sub> O                               | - | 2.6                                     | -                         | -                          |
| Bs YtvA (2PR5)                 | Asn43   | Phe46 NH                                       | 3 | 2.9 (129)                               | Val27 NH                  | 2.9 (154)                  |
| Gs Hkin2 (2R78)                | Asn40   | Ile43 NH                                       | 3 | 3.0 (128)                               | Ile27 NH                  | 3.0 (159)                  |
| Hs ERG (1BYW)                  | Asn45   | Phe48 NH                                       | 3 | 2.9 (145)                               | Phe29 NH                  | 3.2 (158)                  |
| Hs PasK (ILL8)                 | Asn25   | Ala28 NH                                       | 3 | 3.2 (147)                               | Ile11 NH                  | 3.4 (142)                  |
| Vp NR(II) (3B33)               | Asn30   | Ala33 NH                                       | 3 | 3.0 (156)                               | Thr17 NH                  | 2.9 (167)                  |
| Ro rha1 (3FG8)                 | Asn144  | Cys147 NH                                      | 3 | 3.0 (165)                               | Phe131 NH                 | 3.0 (158)                  |
| Hm HTR-1 (3BWL)                | Asn426  | Phe429 NH                                      | 3 | 2.9 (156)                               | Ile413 NH                 | 2.9 (119)                  |
| Hm HTR-1 (3FC7)                | Asn161  | SeMet164NH                                     | 3 | 3.8 (107)                               | Ile148 NH                 | 2.5 (127)                  |
| Ec TYRR (2JHE)                 | Asn106  | Ser109 NH                                      | 3 | 2.8 (163)                               | <sup>c</sup>              |                            |
| Ser                            |         | OG                                             |   |                                         | OG                        |                            |
| Ss Cph1 (2VEA)                 | Ser46   | Asn48 OD1                                      | 2 | 2.6 (163)                               | Val32 NH                  | 3.1 (166)                  |
| Bj FixL (1DP6)                 | Ser169  | Ala172 NH                                      | 3 | 3.4 (130)                               | Met156 NH                 | 3.2 (173)                  |
| Ac LOV2 (1G28)                 | Ser947  | Phe950 NH                                      | 3 | 3.3 (141)                               | Phe931 NH                 | 3.0 (137)                  |
| Cr LOV1 (1N9L)                 | Ser38   | Phe41 NH                                       | 3 | 3.2 (140)                               | Phe22 NH                  | 3.1 (159)                  |
| As LOV2 (2V1A)                 | Ser431  | Phe434 NH                                      | 3 | 3.1 (162)                               | Phe415 NH                 | 3.3 (140)                  |
| At LOV1 (2Z6C)                 | Ser215  | Ala216 C=O                                     | 1 | 3.1 (159)                               | Phe199 NH                 | 2.9 (166)                  |
| NcVivid (2PD7)                 | Ser89   | Phe92 NH                                       | 3 | 3.4 (148)                               | Leu73 NH                  | 3.1 (166)                  |
| PF0695 (3CAX) <sup>d</sup>     | Ser379  | Arg383 NH <sub>2</sub>                         | 4 | 3.0 (122)                               | Val366 NH                 | 2.8 (152)                  |
| Rp BphP3 (2OOL)                | Ser59   | Asn61 OD1                                      | 2 | 2.6 (163)                               | Leu45 NH                  | 3.1 (169)                  |
| Dr Bphy (2O9C)                 | Ser55   | Asn57 OD1                                      | 2 | 2.7 (160)                               | Leu41 NH                  | 3.0 (157)                  |
| Bs Kina (2VLG)                 | Ser31   | Asn33 OG                                       | 2 | 2.9 (168)                               | His18 NH                  | 2.8 (161)                  |
| Asp                            |         | OD1                                            |   |                                         | OD2                       |                            |
| Hs ARNT (2B02)                 | Asp377  | Arg379 NH                                      | 2 | 2.9 (168)                               | Ile364 NH                 | 2.8 (164)                  |
| Hs Hif2a (3F1N)                | Asp258  | Arg260 NH <sub>2</sub>                         | 2 | 2.0 (152)                               | Leu245 NH                 | 1.9 (155)                  |
| Thr                            |         | OG1                                            |   |                                         | OG1                       |                            |
| Dm PER (1WA9)                  | Thr255  | Ser257 OG1                                     | 3 | 2.7 (102)                               | Cys241 NH                 | 3.2 (140)                  |
| Gly                            |         | -                                              |   |                                         | -                         |                            |
| Nc STHK (2P04)                 | Gly33   | -                                              | - | -                                       | -                         | -                          |

<sup>a</sup> Hh = *Halorhodospira halophila*; Rc = *Rhodospirillum centenum*; Rm = *Rhizobium meliloti*; Av = *Azotobacter vinelandii*; Ec = *Escherichia coli*; Bs = *Bacillus subtilis*; Gs = *Geobacter sulfurreducens*; Hs = *Homo sapiens*; Bj = *Bradyrhizobium japonicum*; Ac = *Adiantum capillus-veneris*; Cr = *Chlamydomonas reinhardtii*; Hm = *Haloarcula marismortui*; Vp = *Vibrio parahaemolyticus*; Ro = *Rhodococcus sp.*; At = *Arabidopsis thaliana*; As = *Avena sativa*; Rp = *Rhodopseudomonas palustris*; Dm = *Drosophila melanogaster*; Ss = *Synechocystis sp. pcc 6803*; Nc = *Neurospora crassa*; Dr = *Deinococcus radiodurans*; Nc = *Nostoc punctiforme pcc 73102*. <sup>b</sup> The hydrogen bonding length and angle are indicated. <sup>c</sup> NH<sub>2</sub> – Glu91C=O (3.0 Å, 153 degrees); <sup>d</sup> Uncharacterized protein PF0695.
